# Supplementary material for: Mismatch repair protein MSH2 regulates translesion DNA synthesis following exposure of cells to UV radiation
Source: PubMed Central journal article supplement (PMC3905884; doi:10.1093/nar/gkt793), 2013-09-12

## SUPPLEMENTARY FIGURE LEGENDS

**Fig. S1.** MSH2 interacts with REV1. **(A)** Anti-Flag M2 agarose affinity gel was incubated with 293T cell lysates expressing GFP-REV1 wild-type (WT) or UBM\* mutant (U\*) and Flag-MSH2 or Flag (control) as indicated. Bound proteins were detected by western blot with anti-GFP or anti-Flag antibodies. **(B)** Anti-Flag M2 agarose affinity gel was incubated with 293T cell lysates expressing Flag-REV1 or Flag (control) as indicated. Bound proteins were detected by western blot with anti-MSH2 or anti-Flag antibodies. Inputs contain about 1/50 of the lysates used for the immunoprecipitations.

**Fig. S2.** MSH2 is required for optimal REV1 focus formation after UV irradiation. **(A)** REV1 focus formation after UV irradiation. MSH2-depleted U2OS cells were transfected with GFP-REV1 and then irradiated with 10 J/m<sup>2</sup> UVC radiation and further incubated for 8 hours. The proportion of GFP-REV1 expressing cells with more than 30 foci was determined (Left panel). Right panel: Representative fluorescence images of REV1 focus formation in cells transfected with siMSH2 or siNC. **(B)** U2OS cells were transfected with two other siMSH2 oligos or siNC. Left panel: The cell lysates were harvested at 50 h following transfection and separated by SDS-PAGE. The levels of MSH2 were detected by western blot with anti-MSH2 antibodies. Right panel: The cells were transfected with GFP-REV1 at 50 h following siRNA transfection. REV1 focus formation was measured as in **(A)**. **(C)** REV1 focus formation in U2OS/ shMSH2 (3'-UTR)/ Flag-MSH2 cells after UV irradiation. Left panel: U2OS cells were infected with either shMSH2 (3'-UTR) or shNC and selected with puromycin for about 7 days. The cell lysates were harvested and separated by SDS-PAGE. The levels of MSH2 were detected by western blot with anti-MSH2 antibodies. Right panel: U2OS/ shMSH2 (3'-UTR) cells were complemented with either Flag or Flag-MSH2 and REV1 focus formation were measured as in **(A)**.

**Fig. S3.** MSH6 is required for optimal TLS polymerase focus formation after UV exposure. **(A)** U2OS cells were transfected with siMSH6 or siNC and cell lysates were harvested 72 h later and separated by SDS-PAGE. The levels of MSH6 were detected by western blot with anti-MSH6 antibodies. MSH6-depleted U2OS cells were transfected with GFP-Polκ or GFP-REV1. 40 h later, the cells were irradiated with 15 J/m<sup>2</sup> UVC and further incubated for 12 h. The proportion of GFP-Polκ **(B)** or GFP-REV1 **(C)** expressing cells with more than 30 foci was determined.

**Fig. S4.** Depletion of MSH2 impairs post-UV PCNA-mUb in HCT116 cells. HCT116 cells were transfected with siMSH2 or siNC and exposed to UVC ( $15 \text{ J/m}^2$ ) radiation 72 h later. 4 h later, the triton-insoluble fractions were harvested and separated by SDS-PAGE. The levels of PCNA-mUb and MSH2 were detected by western blot with antibodies against PCNA and MSH2. The levels of Ku 80 were used as loading controls.

**Fig. S5.** MSH2 is required for optimal Rad18 foci formation after UV exposure. U2OS cells were transfected with siMSH2 or siNC and mock- **(A)** or UVC ( $15 \text{ J/m}^2$ ) irradiated **(B)** at 72 h following transfection. 4 h later, the cells were treated with 0.5% Triton X-100 for 5 min before fixation with 4% PFA to remove the soluble Rad18. The cells were then immunostained for Rad18 (red) in nuclei (DAPI, blue). Merge represents combined staining for Rad18 and for nuclei.

**Fig. S6.** Overexpression of MSH2 does not increase the levels of PCNA-mUb in 293T cells. 293T cells were transfected with Flag-MSH2 or Flag and exposed to UVC ( $15 \text{ J/m}^2$ ) radiation 40 h later. 4 h later, the triton-insoluble fractions were harvested and separated by SDS-PAGE. Levels of unmodified PCNA (PCNA) and mUb-PCNA were analyzed by western blot with anti-PCNA antibody and quantified using ImageJ. The levels of MSH2 were detected by western blot with antibodies against MSH2 or Flag.

**Fig. S7.** A MMR-deficient Flag-MSH2 (A834T) rescues REV1 focus formation in U2OS/siMSH2 (3'-UTR) cells after UV irradiation. U2OS cells were transfected with siMSH2 (3'-UTR). Three days later, the cells were complemented with either wild-type (WT) or MMR-deficient Flag-MSH2 (A834T) and REV1 focus formation was measured as in **Fig. S2 (A)**.

Fig. S1, Lv *et al*

**A**

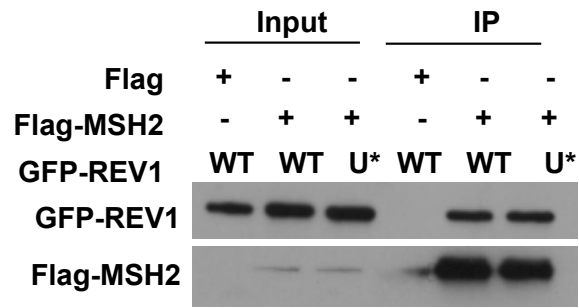

**B**

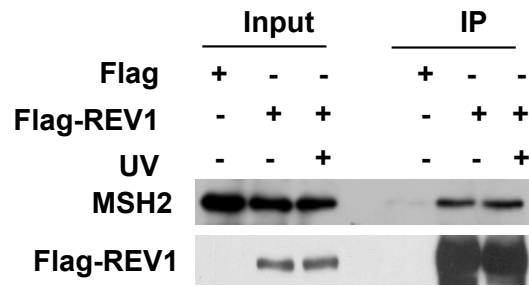

Fig. S2, Lv *et al*

**A**

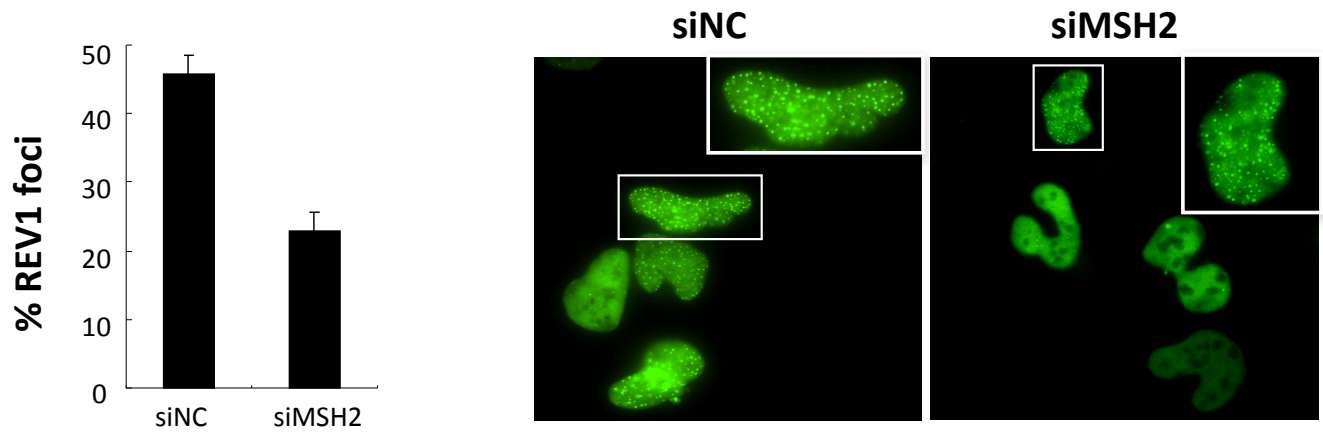

**B**

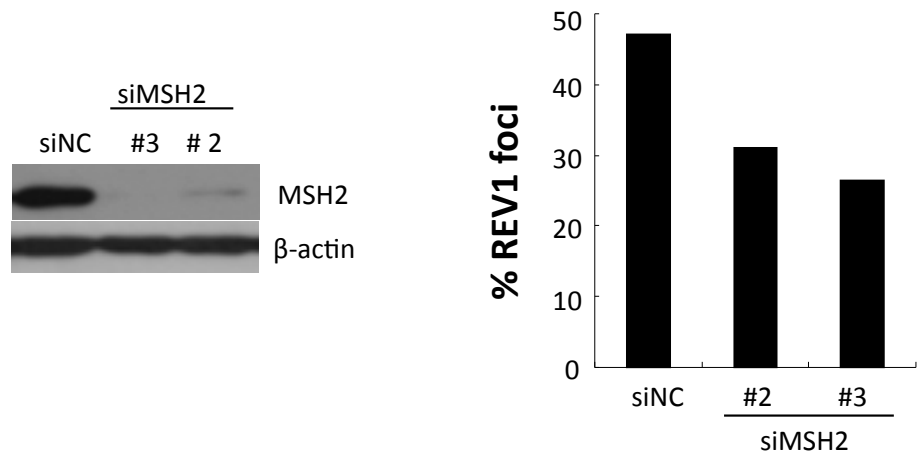

**C**

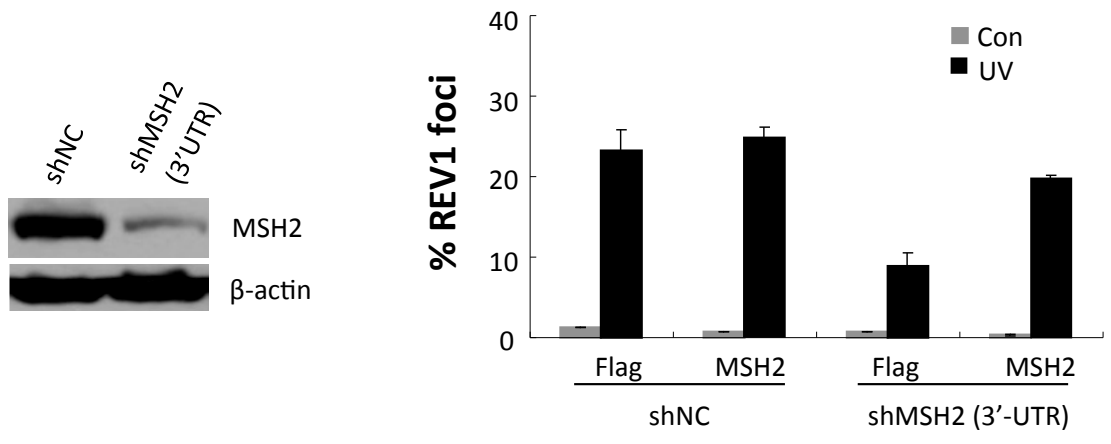

Fig. S3, Lv *et al*

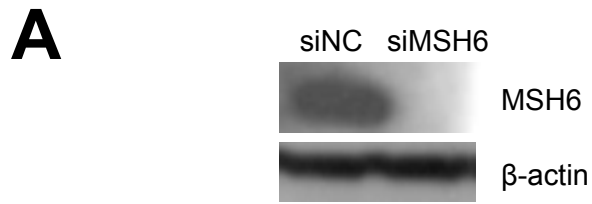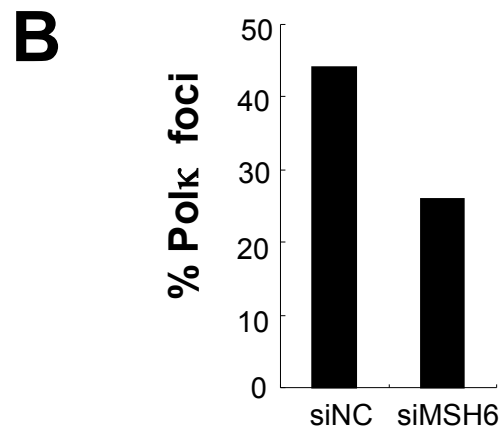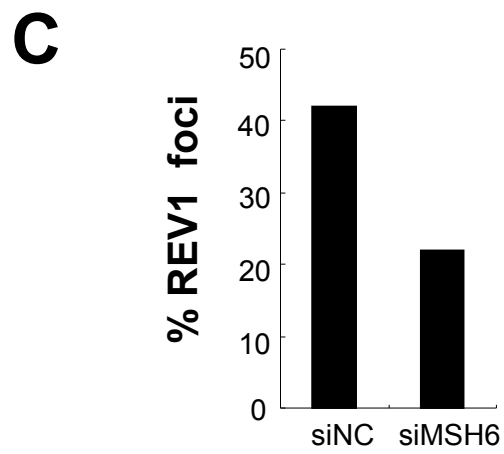

Fig. S4, Lv *et al*

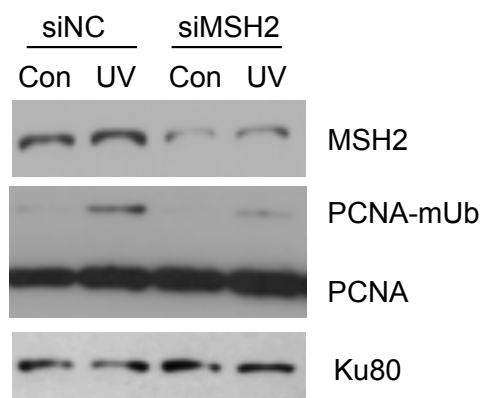

Fig. S5, Lv *et al*

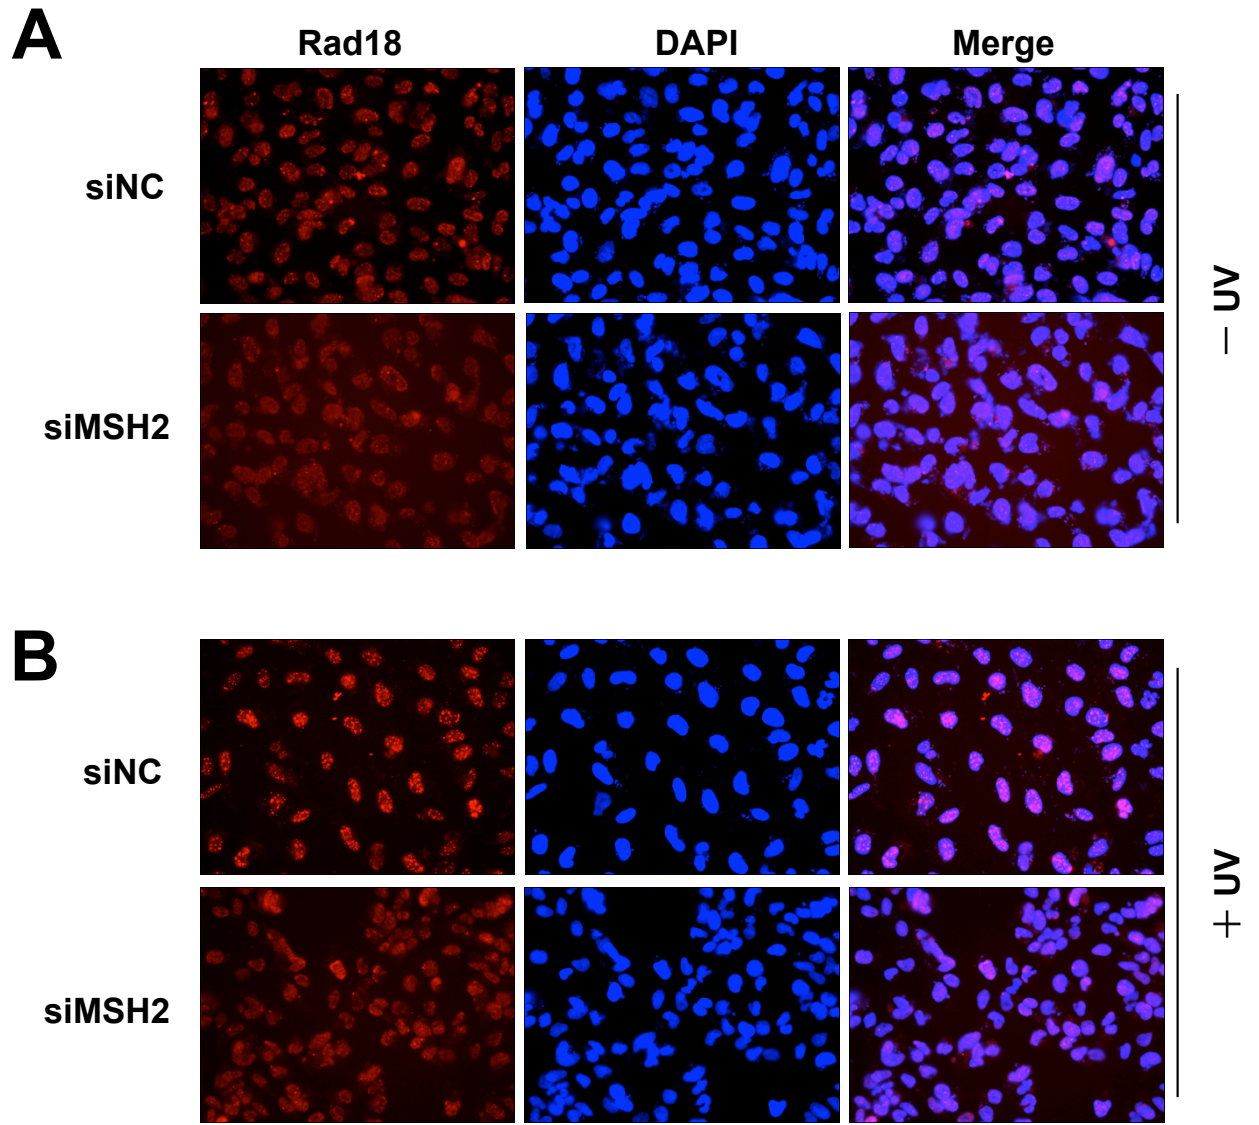

Fig. S6, Lv *et al*

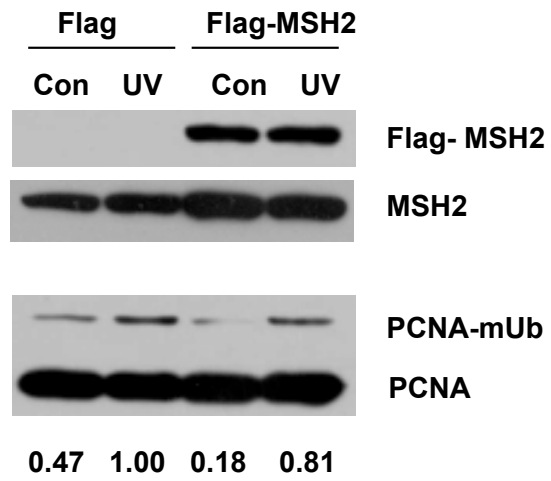



Fig. S7, Lv *et al*

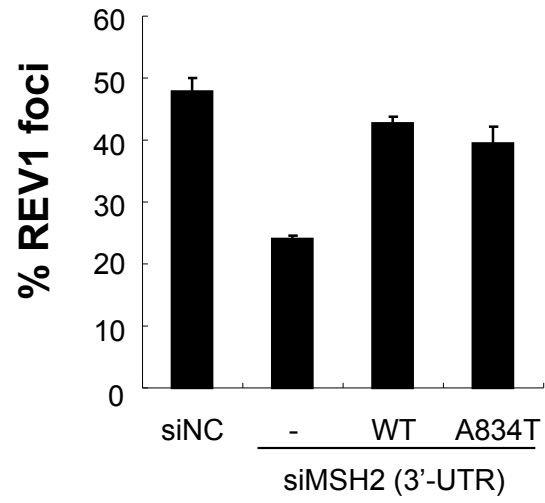

Supplement: supp_gkt793_nar-01957-d-2013-File007.pdf [file supp_gkt793_nar-01957-d-2013-File007.pdf]
